# Supplementary material for: Cancer stem cell-specific expression profiles reveal emerging bladder cancer biomarkers and identify circRNA_103809 as an important regulator in bladder cancer
Source: publisher site journal article supplement (doi:10.18632/aging.102816), 2020-02-17
Supplement: Supplementary file [file aging-v12i4-102816-supplementary-material-SD1.pdf]

SUPPLEMENTARY FIGURE

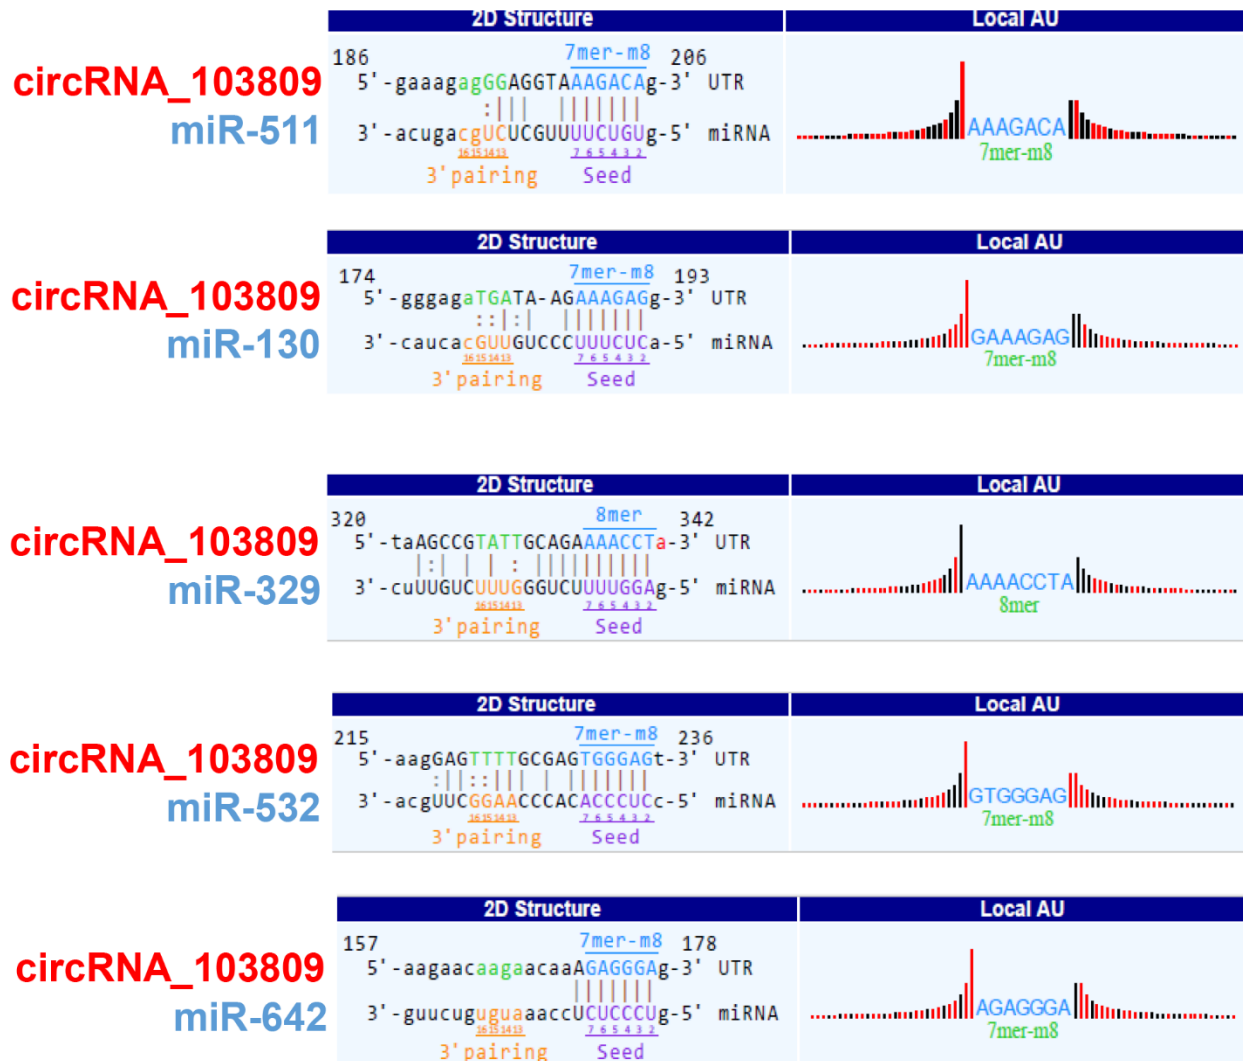

Supplementary Figure 1. Binding sites of miRNAs in 3'UTR of circRNA\_103809.
